# Supplementary material
Source: Elsevier journal article supplement (https://comptes-rendus.academie-sciences.fr/chimie/article/10.1016/j.crci.2006.09.020/file/attach/mmc1.pdf)
Supplement: mmc1 [file mmc1.pdf]

data\_k05kcm23

\_audit\_creation\_method SHELXL-97  
\_chemical\_name\_systematic  
;  
?  
;  
\_chemical\_name\_common ?  
\_chemical\_melting\_point ?  
\_chemical\_formula\_moiety ?  
\_chemical\_formula\_sum  
'C16 H20 Cl6 N2 O2 Sn'  
\_chemical\_formula\_weight 603.73

loop\_

\_atom\_type\_symbol  
\_atom\_type\_description  
\_atom\_type\_scatter\_dispersion\_real  
\_atom\_type\_scatter\_dispersion\_imag  
\_atom\_type\_scatter\_source  
'C' 'C' 0.0033 0.0016  
'International Tables Vol C Tables 4.2.6.8 and 6.1.1.4'  
'H' 'H' 0.0000 0.0000  
'International Tables Vol C Tables 4.2.6.8 and 6.1.1.4'  
'Cl' 'Cl' 0.1484 0.1585  
'International Tables Vol C Tables 4.2.6.8 and 6.1.1.4'  
'N' 'N' 0.0061 0.0033  
'International Tables Vol C Tables 4.2.6.8 and 6.1.1.4'  
'O' 'O' 0.0106 0.0060  
'International Tables Vol C Tables 4.2.6.8 and 6.1.1.4'  
'Sn' 'Sn' -0.6537 1.4246  
'International Tables Vol C Tables 4.2.6.8 and 6.1.1.4'

\_symmetry\_cell\_setting ?  
\_symmetry\_space\_group\_name\_H-M ?

loop\_

\_symmetry\_equiv\_pos\_as\_xyz  
'x, y, z'  
'-x, -y, -z'

\_cell\_length\_a 7.37800(10)  
\_cell\_length\_b 7.44800(10)  
\_cell\_length\_c 11.5170(2)  
\_cell\_angle\_alpha 97.6240(10)  
\_cell\_angle\_beta 91.4810(10)  
\_cell\_angle\_gamma 117.3890(10)  
\_cell\_volume 554.243(14)  
\_cell\_formula\_units\_Z 1

```

_cell_measurement_temperature 150(2)
_cell_measurement_reflns_used ?
_cell_measurement_theta_min ?
_cell_measurement_theta_max ?

_exptl_crystal_description ?
_exptl_crystal_colour ?
_exptl_crystal_size_max ?
_exptl_crystal_size_mid ?
_exptl_crystal_size_min ?
_exptl_crystal_density_meas ?
_exptl_crystal_density_diffn 1.809
_exptl_crystal_density_method 'not measured'
_exptl_crystal_F_000 298
_exptl_absorpt_coefficient_mu 1.891
_exptl_absorpt_correction_type ?
_exptl_absorpt_correction_T_min ?
_exptl_absorpt_correction_T_max ?
_exptl_absorpt_process_details ?

_exptl_special_details
;
?
;

_diffn_ambient_temperature 150(2)
_diffn_radiation_wavelength 0.71073
_diffn_radiation_type MoK\alpha
_diffn_radiation_source 'fine-focus sealed tube'
_diffn_radiation_monochromator graphite
_diffn_measurement_device_type ?
_diffn_measurement_method ?
_diffn_detector_area_resol_mean ?
_diffn_standards_number ?
_diffn_standards_interval_count ?
_diffn_standards_interval_time ?
_diffn_standards_decay_% ?
_diffn_reflns_number 8539
_diffn_reflns_av_R_equivalents 0.0270
_diffn_reflns_av_sigmaI/netI 0.0261
_diffn_reflns_limit_h_min -8
_diffn_reflns_limit_h_max 8
_diffn_reflns_limit_k_min -8
_diffn_reflns_limit_k_max 8
_diffn_reflns_limit_l_min -13
_diffn_reflns_limit_l_max 13
_diffn_reflns_theta_min 3.85
_diffn_reflns_theta_max 24.97
_reflns_number_total 1909
_reflns_number_gt 1890

```

```

_reflns_threshold_expression >2sigma(I)

_computing_data_collection ?
_computing_cell_refinement ?
_computing_data_reduction ?
_computing_structure_solution ?
_computing_structure_refinement 'SHELXL-97 (Sheldrick, 1997)'
_computing_molecular_graphics ?
_computing_publication_material ?

```

```
_refine_special_details
```

```
;
```

Refinement of  $F^2$  against ALL reflections. The weighted R-factor  $wR$  and goodness of fit  $S$  are based on  $F^2$ , conventional R-factors  $R$  are based on  $F$ , with  $F$  set to zero for negative  $F^2$ . The threshold expression of  $F^2 > 2\sigma(F^2)$  is used only for calculating R-factors(gt) etc. and is not relevant to the choice of reflections for refinement. R-factors based on  $F^2$  are statistically about twice as large as those based on  $F$ , and R-factors based on ALL data will be even larger.

```
;
```

```

_refine_ls_structure_factor_coef Fsqd
_refine_ls_matrix_type full
_refine_ls_weighting_scheme calc
_refine_ls_weighting_details
'calc w=1/[s^2*(Fo^2)+(0.0120P)^2+0.2090P] where P=(Fo^2+2Fc^2)/3'
_atom_sites_solution_primary direct
_atom_sites_solution_secondary difmap
_atom_sites_solution_hydrogens geom
_refine_ls_hydrogen_treatment mixed
_refine_ls_extinction_method none
_refine_ls_extinction_coef ?
_refine_ls_number_reflns 1909
_refine_ls_number_parameters 136
_refine_ls_number_restraints 0
_refine_ls_R_factor_all 0.0156
_refine_ls_R_factor_gt 0.0154
_refine_ls_wR_factor_ref 0.0390
_refine_ls_wR_factor_gt 0.0388
_refine_ls_goodness_of_fit_ref 1.104
_refine_ls_restrained_S_all 1.104
_refine_ls_shift/su_max 0.001
_refine_ls_shift/su_mean 0.000

```

```
loop_
```

```

_atom_site_label
_atom_site_type_symbol
_atom_site_fract_x
_atom_site_fract_y
_atom_site_fract_z

```

\_atom\_site\_U\_iso\_or\_equiv  
\_atom\_site\_adp\_type  
\_atom\_site\_occupancy  
\_atom\_site\_symmetry\_multiplicity  
\_atom\_site\_calc\_flag  
\_atom\_site\_refinement\_flags  
\_atom\_site\_disorder\_assembly  
\_atom\_site\_disorder\_group

Sn Sn 0.5000 0.0000 0.0000 0.01455(7) Uani 1 2 d S . .  
Cl1 Cl 0.16150(6) -0.22514(6) 0.05433(3) 0.02076(10) Uani 1 1 d . . .  
Cl2 Cl 0.64998(6) -0.18451(6) 0.09292(3) 0.02024(10) Uani 1 1 d . . .  
Cl3 Cl 0.56731(6) 0.22768(6) 0.18357(3) 0.02169(10) Uani 1 1 d . . .  
O1 O 1.36508(17) 0.52884(18) 0.36931(10) 0.0281(3) Uani 1 1 d . . .  
N1 N 1.2489(2) 0.4143(3) 0.14543(14) 0.0232(3) Uani 1 1 d . . .  
H10A H 1.216(4) 0.497(4) 0.120(2) 0.050(7) Uiso 1 1 d . . .  
H10B H 1.262(4) 0.338(4) 0.087(2) 0.055(7) Uiso 1 1 d . . .  
H10C H 1.366(4) 0.494(4) 0.186(2) 0.052(7) Uiso 1 1 d . . .  
C1 C 1.1055(2) 0.2873(3) 0.22441(14) 0.0224(3) Uani 1 1 d . . .  
H1A H 1.0878 0.1459 0.2086 0.027 Uiso 1 1 calc R . .  
H1B H 0.9697 0.2812 0.2104 0.027 Uiso 1 1 calc R . .  
C2 C 1.1941(2) 0.3834(2) 0.35142(14) 0.0199(3) Uani 1 1 d . . .  
C3 C 1.0664(2) 0.2936(2) 0.44582(14) 0.0189(3) Uani 1 1 d . . .  
C4 C 1.1441(3) 0.3808(2) 0.56302(14) 0.0220(3) Uani 1 1 d . . .  
H4 H 1.2768 0.4952 0.5808 0.026 Uiso 1 1 calc R . .  
C5 C 1.0272(3) 0.2998(3) 0.65272(14) 0.0255(4) Uani 1 1 d . . .  
H5 H 1.0795 0.3592 0.7323 0.031 Uiso 1 1 calc R . .  
C6 C 0.8340(3) 0.1323(3) 0.62699(15) 0.0257(4) Uani 1 1 d . . .  
H6 H 0.7537 0.0786 0.6891 0.031 Uiso 1 1 calc R . .  
C7 C 0.7570(3) 0.0425(3) 0.51110(15) 0.0240(4) Uani 1 1 d . . .  
H7 H 0.6257 -0.0741 0.4939 0.029 Uiso 1 1 calc R . .  
C8 C 0.8728(2) 0.1238(2) 0.42053(14) 0.0216(3) Uani 1 1 d . . .  
H8 H 0.8200 0.0636 0.3410 0.026 Uiso 1 1 calc R . .

loop\_

\_atom\_site\_aniso\_label  
\_atom\_site\_aniso\_U\_11  
\_atom\_site\_aniso\_U\_22  
\_atom\_site\_aniso\_U\_33  
\_atom\_site\_aniso\_U\_23  
\_atom\_site\_aniso\_U\_13  
\_atom\_site\_aniso\_U\_12

Sn 0.01356(10) 0.01427(10) 0.01314(10) -0.00040(6) -0.00002(6) 0.00500(7)  
Cl1 0.0150(2) 0.0224(2) 0.0208(2) 0.00499(16) 0.00225(15) 0.00495(17)  
Cl2 0.0202(2) 0.0200(2) 0.0205(2) 0.00314(15) -0.00052(15) 0.00952(17)  
Cl3 0.0228(2) 0.0233(2) 0.01627(19) -0.00566(15) -0.00246(15) 0.01108(17)  
O1 0.0199(6) 0.0277(6) 0.0269(6) -0.0001(5) -0.0011(5) 0.0043(5)  
N1 0.0233(8) 0.0247(8) 0.0223(8) 0.0046(7) 0.0031(6) 0.0116(7)  
C1 0.0190(8) 0.0241(8) 0.0211(8) 0.0038(7) 0.0021(6) 0.0075(7)  
C2 0.0193(8) 0.0202(8) 0.0227(8) 0.0005(6) -0.0015(6) 0.0123(7)  
C3 0.0203(8) 0.0198(8) 0.0211(8) 0.0015(6) 0.0009(6) 0.0136(7)

C4 0.0228(9) 0.0189(8) 0.0233(8) -0.0017(6) -0.0024(7) 0.0105(7)  
C5 0.0346(10) 0.0264(9) 0.0182(8) -0.0015(7) 0.0002(7) 0.0180(8)  
C6 0.0305(9) 0.0266(9) 0.0247(9) 0.0058(7) 0.0077(7) 0.0167(8)  
C7 0.0218(9) 0.0213(8) 0.0301(9) 0.0038(7) 0.0026(7) 0.0111(7)  
C8 0.0220(8) 0.0232(8) 0.0209(8) -0.0007(7) -0.0023(7) 0.0129(7)

\_geom\_special\_details

;

All esds (except the esd in the dihedral angle between two l.s. planes) are estimated using the full covariance matrix. The cell esds are taken into account individually in the estimation of esds in distances, angles and torsion angles; correlations between esds in cell parameters are only used when they are defined by crystal symmetry. An approximate (isotropic) treatment of cell esds is used for estimating esds involving l.s. planes.

;

loop\_

\_geom\_bond\_atom\_site\_label\_1

\_geom\_bond\_atom\_site\_label\_2

\_geom\_bond\_distance

\_geom\_bond\_site\_symmetry\_2

\_geom\_bond\_publ\_flag

Sn Cl3 2.4107(4) 2\_655 ?

Sn Cl3 2.4107(4) . ?

Sn Cl1 2.4386(4) 2\_655 ?

Sn Cl1 2.4386(4) . ?

Sn Cl2 2.4467(4) . ?

Sn Cl2 2.4467(4) 2\_655 ?

O1 C2 1.215(2) . ?

N1 C1 1.483(2) . ?

N1 H10A 0.83(3) . ?

N1 H10B 0.86(3) . ?

N1 H10C 0.87(3) . ?

C1 C2 1.524(2) . ?

C1 H1A 0.9900 . ?

C1 H1B 0.9900 . ?

C2 C3 1.478(2) . ?

C3 C8 1.394(2) . ?

C3 C4 1.399(2) . ?

C4 C5 1.381(2) . ?

C4 H4 0.9500 . ?

C5 C6 1.386(2) . ?

C5 H5 0.9500 . ?

C6 C7 1.388(2) . ?

C6 H6 0.9500 . ?

C7 C8 1.386(2) . ?

C7 H7 0.9500 . ?

C8 H8 0.9500 . ?

loop\_

\_geom\_angle\_atom\_site\_label\_1  
\_geom\_angle\_atom\_site\_label\_2  
\_geom\_angle\_atom\_site\_label\_3  
\_geom\_angle  
\_geom\_angle\_site\_symmetry\_1  
\_geom\_angle\_site\_symmetry\_3  
\_geom\_angle\_publ\_flag  
Cl3 Sn Cl3 180.000(11) 2\_655 . ?  
Cl3 Sn Cl1 89.722(13) 2\_655 2\_655 ?  
Cl3 Sn Cl1 90.278(13) . 2\_655 ?  
Cl3 Sn Cl1 90.278(13) 2\_655 . ?  
Cl3 Sn Cl1 89.722(13) . . ?  
Cl1 Sn Cl1 180.00(3) 2\_655 . ?  
Cl3 Sn Cl2 90.030(13) 2\_655 . ?  
Cl3 Sn Cl2 89.970(13) . . ?  
Cl1 Sn Cl2 88.929(13) 2\_655 . ?  
Cl1 Sn Cl2 91.071(12) . . ?  
Cl3 Sn Cl2 89.970(13) 2\_655 2\_655 ?  
Cl3 Sn Cl2 90.030(13) . 2\_655 ?  
Cl1 Sn Cl2 91.071(13) 2\_655 2\_655 ?  
Cl1 Sn Cl2 88.929(13) . 2\_655 ?  
Cl2 Sn Cl2 180.000(19) . 2\_655 ?  
C1 N1 H10A 114.2(17) . . ?  
C1 N1 H10B 110.8(17) . . ?  
H10A N1 H10B 109(2) . . ?  
C1 N1 H10C 108.3(16) . . ?  
H10A N1 H10C 103(2) . . ?  
H10B N1 H10C 111(2) . . ?  
N1 C1 C2 108.49(13) . . ?  
N1 C1 H1A 110.0 . . ?  
C2 C1 H1A 110.0 . . ?  
N1 C1 H1B 110.0 . . ?  
C2 C1 H1B 110.0 . . ?  
H1A C1 H1B 108.4 . . ?  
O1 C2 C3 123.83(15) . . ?  
O1 C2 C1 118.35(14) . . ?  
C3 C2 C1 117.82(14) . . ?  
C8 C3 C4 119.73(15) . . ?  
C8 C3 C2 121.53(15) . . ?  
C4 C3 C2 118.73(15) . . ?  
C5 C4 C3 119.75(15) . . ?  
C5 C4 H4 120.1 . . ?  
C3 C4 H4 120.1 . . ?  
C4 C5 C6 120.25(16) . . ?  
C4 C5 H5 119.9 . . ?  
C6 C5 H5 119.9 . . ?  
C5 C6 C7 120.43(16) . . ?  
C5 C6 H6 119.8 . . ?  
C7 C6 H6 119.8 . . ?  
C8 C7 C6 119.66(16) . . ?

C8 C7 H7 120.2 . . ?  
C6 C7 H7 120.2 . . ?  
C7 C8 C3 120.15(15) . . ?  
C7 C8 H8 119.9 . . ?  
C3 C8 H8 119.9 . . ?

\_diffn\_measured\_fraction\_theta\_max 0.983  
\_diffn\_reflns\_theta\_full 24.97  
\_diffn\_measured\_fraction\_theta\_full 0.983  
\_refine\_diff\_density\_max 0.285  
\_refine\_diff\_density\_min -0.702  
\_refine\_diff\_density\_rms 0.071
